# Supplementary material
Source: PubMed Central journal article supplement (PMC5423854)
Supplement: NIHMS827960-supplement-supplement_1.pdf [file NIHMS827960-supplement-supplement_1.pdf]

**Supplemental Table 1 – Vitamin D insufficiency and current asthma or current wheeze by race/ethnicity and current smoking status in adults, NHANES 2001-2010**

|                                               | Current smoker<br>(n=5176) | Not current smoker<br>(n=16891) |
|-----------------------------------------------|----------------------------|---------------------------------|
| Vitamin D insufficiency<br>25(OH)D < 30 ng/ml | OR (95% CI), P-value       | OR (95% CI), P-value            |
| <b>Current asthma</b>                         |                            |                                 |
| All participants <sup>1</sup>                 | 0.96 (0.73, 1.26), 0.77    | 1.09 (0.91, 1.31), 0.36         |
| Non-Hispanic whites                           | 1.07 (0.74, 1.39), 0.93    | 1.08 (0.89, 1.31), 0.44         |
| Non-Hispanic blacks                           | 0.96 (0.23, 4.07), 0.96    | 1.74 (0.95, 3.20), 0.07         |
| Mexican American/other Hispanic               | 0.68 (0.35, 1.35), 0.27    | 0.96 (0.61, 1.51), 0.85         |
| <b>Current wheeze</b>                         |                            |                                 |
| All participants <sup>1</sup>                 | 1.10 (0.90, 1.35), 0.34    | 1.17 (0.99, 1.38), 0.06         |
| Non-Hispanic whites                           | 1.17 (0.94, 1.45), 0.17    | <b>1.20 (1.02, 1.42), 0.03</b>  |
| Non-Hispanic blacks                           | 0.66 (0.31, 1.41), 0.28    | <b>1.55 (1.01, 2.38), 0.04</b>  |
| Mexican American/other Hispanic               | 0.72 (0.42, 1.24), 0.24    | 1.13 (0.76, 1.68), 0.53         |

All models adjusted for age, gender, household income, cotinine, C-reactive protein, BMI (in adults) and BMIZ (in children).

<sup>1</sup>Additionally adjusted for race/ethnicity

**Supplemental Table 2– Vitamin D insufficiency and lung function measures (as percent of predicted values), NHANES 2007-2010**

| <b>Lung Function Measures</b>     | <b>Children<br/>(n=2036)</b>                 | <b>Adults<br/>(n=7611)</b>                   |
|-----------------------------------|----------------------------------------------|----------------------------------------------|
|                                   | <b><math>\beta</math> (95% CI), P-value.</b> | <b><math>\beta</math> (95% CI), P-value.</b> |
| % predicted FEV <sub>1</sub>      | <b>-2.93 (-4.02, -1.85), &lt;0.01</b>        | -0.56 (-1.33, 0.21), 0.15                    |
| % predicted FVC                   | <b>-3.67 (-4.86, -2.47), &lt;0.01</b>        | <b>-2.96 (-4.01, -1.90), &lt;0.01</b>        |
| % predicted FEV <sub>1</sub> /FVC | -0.30 (-1.23, 0.63), 0.52                    | <b>0.58 (0.14, 1.02), 0.01</b>               |

All models adjusted for household income, current asthma, cotinine, C-reactive protein, BMI (in adults) and BMIZ (in children).

**Supplemental Table 3–Vitamin D insufficiency and lung function measures by current asthma, NHANES 2007-2010**

| Lung Function Measures                                | Children (n=3,001)                         | Adults (n=8,347)                           |
|-------------------------------------------------------|--------------------------------------------|--------------------------------------------|
|                                                       | $\beta$ (95% CI), P-value.                 | $\beta$ (95% CI), P-value.                 |
| <b>No current asthma</b>                              | n=2654                                     | n=7743                                     |
| Pre-bronchodilator FEV <sub>1</sub> (ml) <sup>1</sup> | <b>-118.95 (-156.49, -81.42), &lt;0.01</b> | <b>-67.39 (-89.43, -45.35), &lt;0.01</b>   |
| Pre-bronchodilator FVC, (ml) <sup>1</sup>             | <b>-133.36 (-180.55, -86.17), &lt;0.01</b> | <b>-116.23 (-148.06, -84.40), &lt;0.01</b> |
| Pre-bronchodilator FEV <sub>1</sub> /FVC (%)          | 0.25 (-0.67, 1.17), 0.58                   | <b>0.51 (0.12, 0.91), 0.01</b>             |
| <b>Current asthma</b>                                 | n=347                                      | n=604                                      |
| Pre-bronchodilator FEV <sub>1</sub> (ml) <sup>1</sup> | <b>-174.40 (-300.13, -48.67), &lt;0.01</b> | -112.73 (-230.65, 5.19), 0.06              |
| Pre-bronchodilator FVC, (ml) <sup>1</sup>             | -70.73 (-168.54, 27.08), 0.15              | <b>-145.35 (-271.92, -18.78), 0.03</b>     |
| Pre-bronchodilator FEV <sub>1</sub> /FVC (%)          | <b>-2.95 (-4.64, -1.26), &lt;0.01</b>      | -0.53 (-2.40, 1.35), 0.57                  |

All models adjusted for age, gender, household income, serum cotinine, C-reactive protein, BMI (in adults) and BMI z-score (in children).

<sup>1</sup>Additionally adjusted for height and height square
